# Supplementary material for: Membraneless channels sieve cations in ammonia-oxidizing marine archaea
Source: PubMed Central journal article supplement (PMC11153153; doi:10.1038/s41586-024-07462-5), 2024-05-29
Supplement: 41586_2024_7462_MOESM1_ESM.pdf [file 41586_2024_7462_MOESM1_ESM.pdf]

**Supplementary information**

---

**Membraneless channels sieve cations in ammonia-oxidizing marine archaea**

---

In the format provided by the authors and unedited

## **Supplementary information for article titled**

Membrane-less channels sieve cations in ammonia-oxidising marine archaea

### **Author information**

Andriko von Kügelgen<sup>1,2</sup>, C. Keith Cassidy<sup>3</sup>, Sofie van Dorst<sup>2</sup>, Lennart L. Pagani<sup>2</sup>, Christopher Batters<sup>4</sup>, Zephyr Ford<sup>2</sup>, Jan Löwe<sup>1</sup>, Vikram Alva<sup>5</sup>, Phillip J. Stansfeld<sup>6</sup>, and Tanmay A. M. Bharat<sup>1,\*</sup>

### **Affiliations**

1 – Structural Studies Division, MRC Laboratory of Molecular Biology, Francis Crick Avenue, Cambridge CB2 0QH, United Kingdom

2 – Sir William Dunn School of Pathology, University of Oxford, Oxford OX1 3RE, United Kingdom

3 – Department of Physics and Astronomy, University of Missouri-Columbia, Columbia, MO, 65211, USA

4 – Protein and Nucleic Acid Chemistry Division, MRC Laboratory of Molecular Biology, Francis Crick Avenue, Cambridge CB2 0QH, United Kingdom

5 – Department of Protein Evolution, Max Planck Institute for Biology Tübingen, Max-Planck-Ring 5, Tübingen 72076, Germany

6 – School of Life Sciences and Department of Chemistry, Gibbet Hill Campus, University of Warwick, Coventry CV4 7AL, United Kingdom

### **\* Correspondence to**

Tanmay A. M. Bharat, email: [tbharat@mrc-lmb.cam.ac.uk](mailto:tbharat@mrc-lmb.cam.ac.uk)

## Supplementary Figures

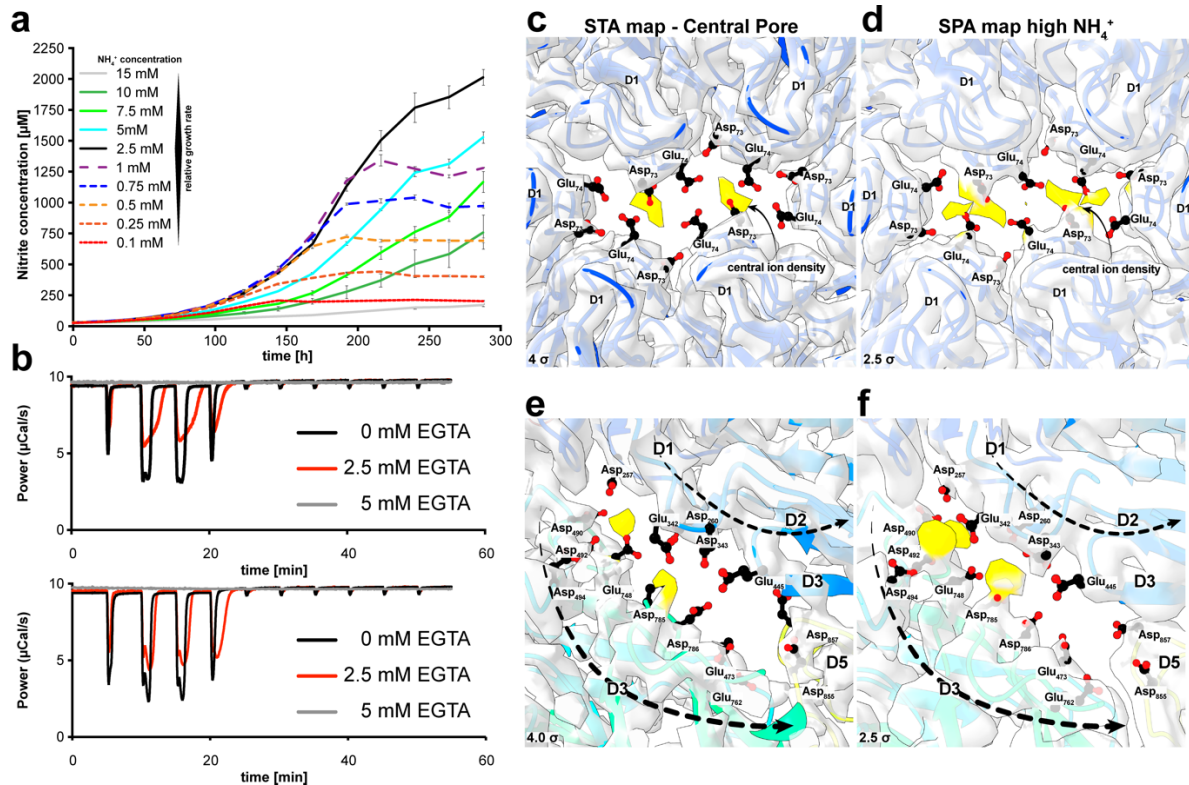

**Supplementary Fig. 1| Ammonium growth, ITC and cryo-EM at increased ammonium concentration.**

**a**, Growth curves of *N. maritimus* in differing ammonium concentrations. Different curves are shown in different colour (colour bar is shown on the left). Growth curves run as biological triplicates with one out of three replicates shown. Error bars are displayed as standard error of mean (S.E.M.). **b**, Ammonium binding to *N. maritimus* cells, biological repeats are shown at different EGTA concentrations, which show different levels of S-layer disruption. **c-f**, Close-up views of pore regions of STA (**c,e**) and SPA maps with high ammonium concentration (**d,f**) with additional unexplained densities.

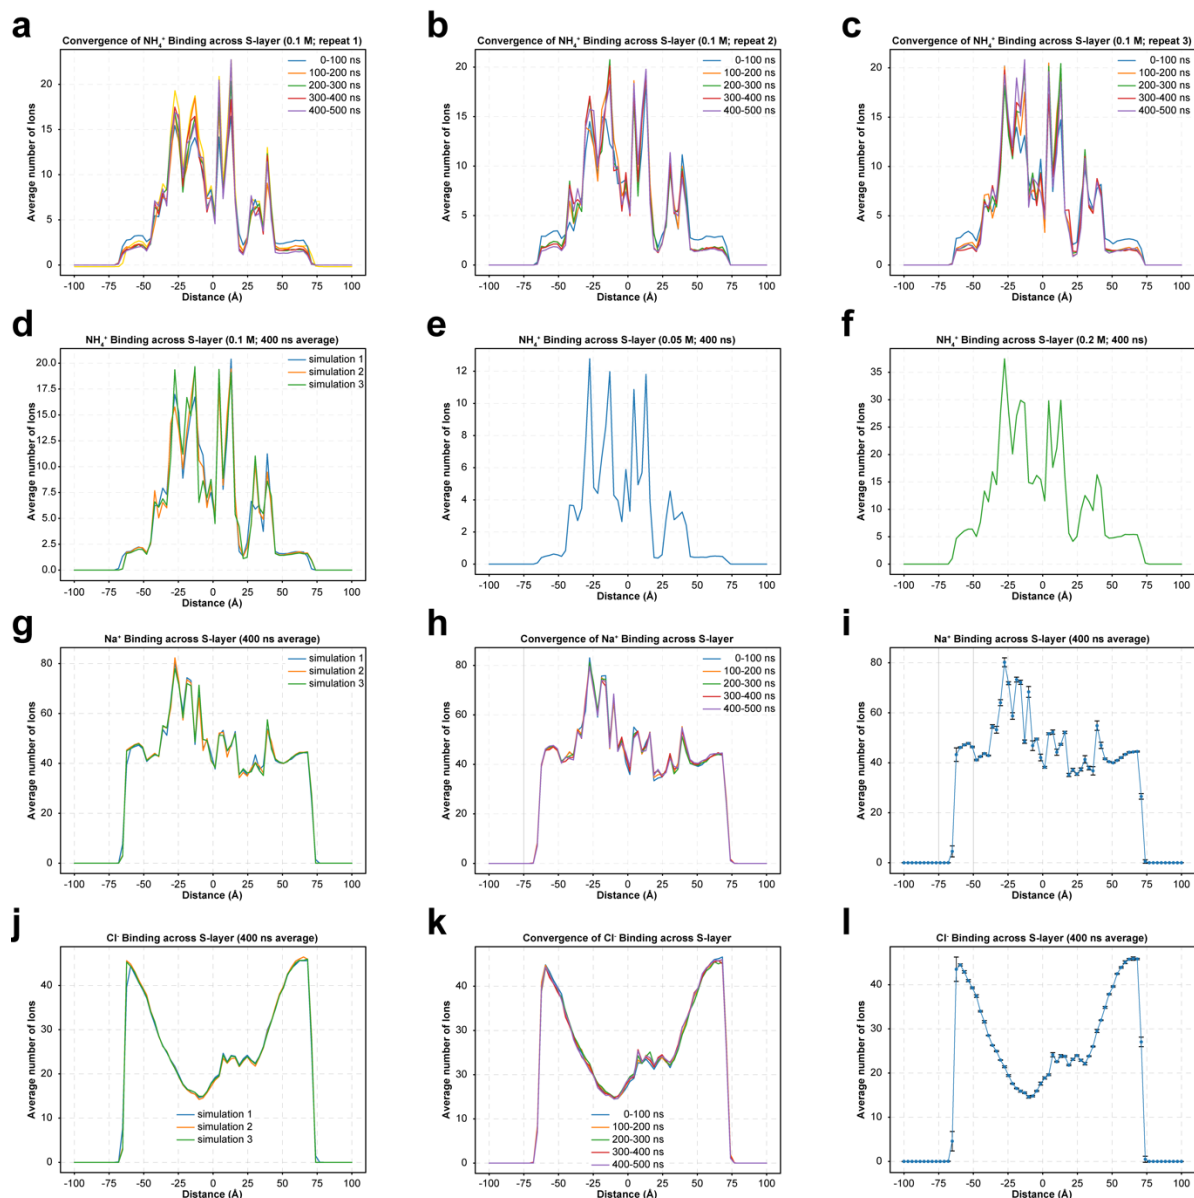

**Supplementary Fig. 2 | Ionic distributions through the S-layer in MD simulations.**

**a-c**, Averaged residence of ammonium ( $\text{NH}_4^+$ ) ions through (in the directional orthogonal to) the S-layer in MD simulations, from the membrane proximal side (left) to the extracellular side (right) across different time windows showing convergence of the MD simulations. **d**, Overlay of averaged residence of ammonium ( $\text{NH}_4^+$ ) ions in three independent simulations averaged over the last 400 ns of each simulation. Note that the first 100 ns of each simulation is not included to allow for equilibration (see Methods). **e-f**, Averaged residence of ammonium ( $\text{NH}_4^+$ ) ions through the S-layer in MD simulations at **e**, reduced ammonium concentrations (0.05 M) and **f**, increased ammonium concentrations (0.2 M) **g**, Overlay of averaged residence

of sodium ( $\text{Na}^+$ ) ions in three independent simulations averaged over the last 400 ns of each simulation. **h**, Convergence of sodium ion residence in MD-simulation (one out of three replicates is shown). **i**, Averaged residence of sodium ( $\text{Na}^+$ ) ions in three independent simulations shown in (g) averaged over the last 400 ns of each simulation. Errors bars denote  $\pm 1$  standard deviation. **j**, Overlay of averaged residence of chloride ( $\text{Cl}^-$ ) ions across three independent simulations averaged over the last 400 ns of each simulation. **k**, Convergence of chloride ion residence in MD-simulations (one out of three replicates is shown). **l**, Averaged residence of chloride ( $\text{Cl}^-$ ) ions in three independent simulations shown in (j) averaged over the last 400 ns of each simulation. Errors bars denote  $\pm 1$  standard deviation.

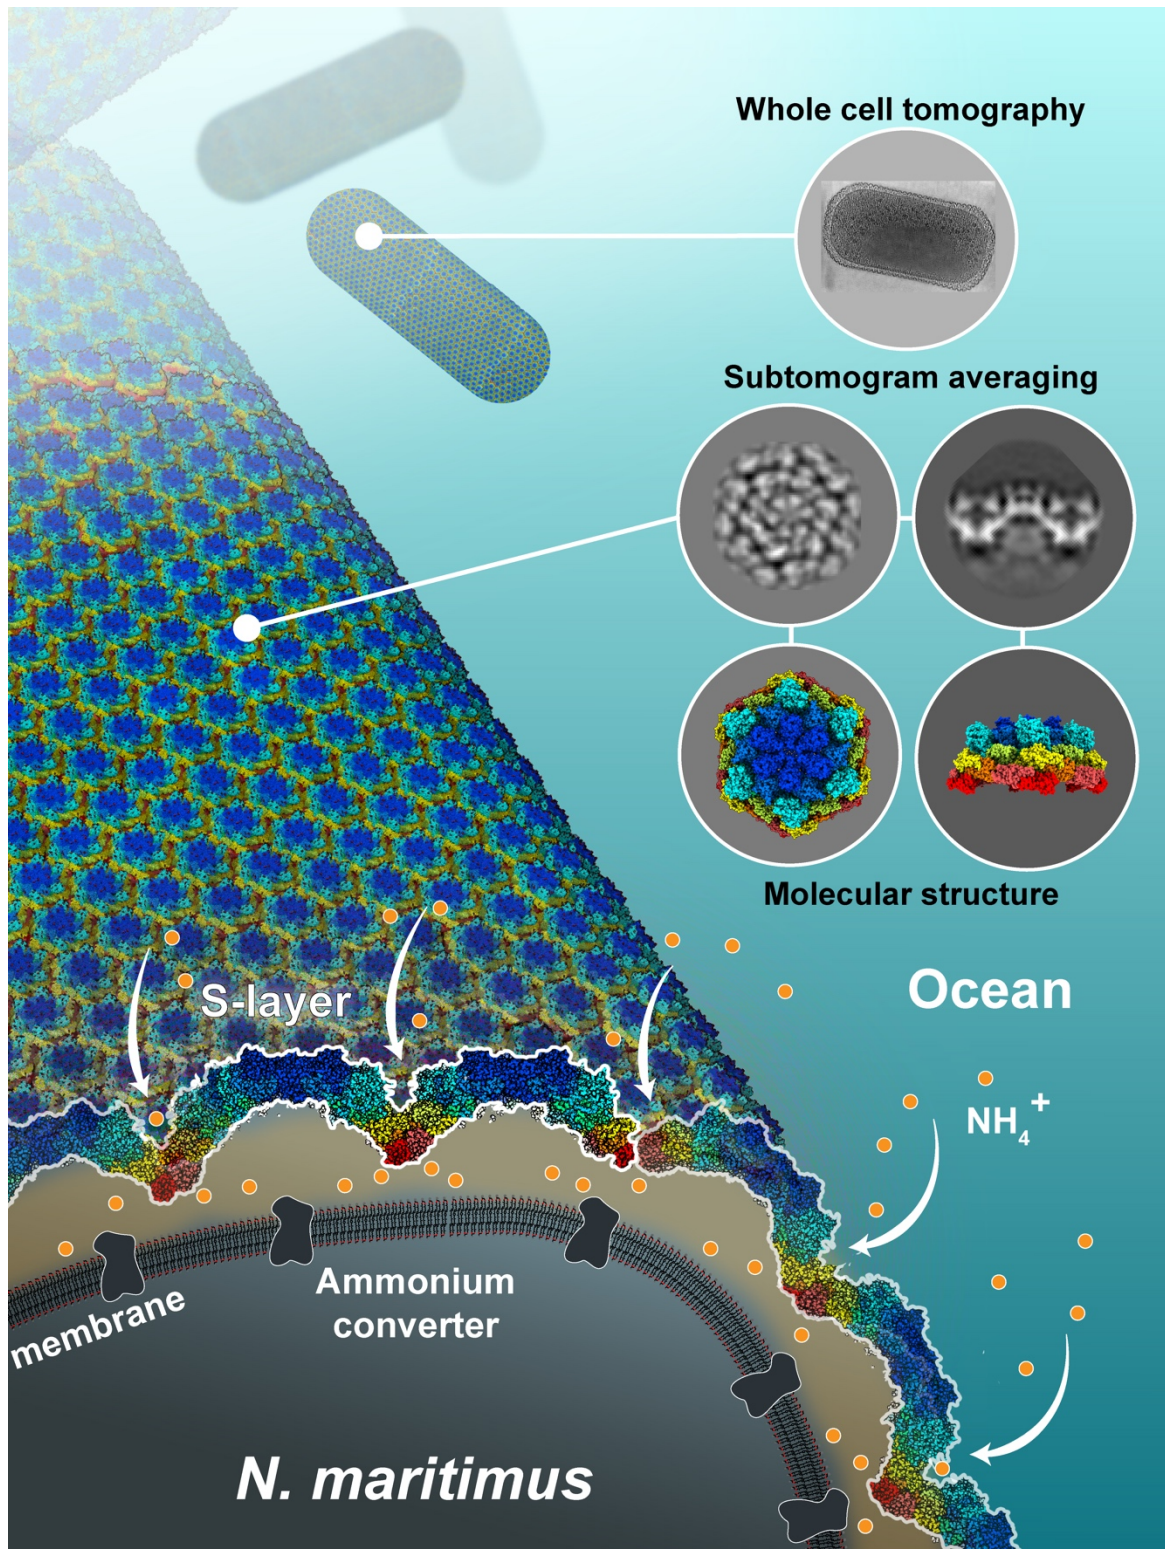

**Supplementary Fig. 3| The S-layer acts as a multi-channel ammonium sieve in marine archaea.**

Schematic description of the methodology used and results generated in this study. Direct structure determination from intact cells allowed us to study a biogeochemically important

process *in situ*, related to ammonium entrapment and multi-path ammonium channelling aided by gradual decrease in charge along the *N. maritimus* S-layer.

## Supplementary Tables

Supplementary Table 1| Predicted net charges of S-layer proteins

| Organism                                          | Protein | NCBI/Uniprot ID | Charge at pH=7.4 |
|---------------------------------------------------|---------|-----------------|------------------|
| <b>Nitrososphaerota (genus Nitrosopumilus)</b>    |         |                 |                  |
| <i>Nitrosopumilus maritimus</i>                   | SlaA    | A9A4Y9          | -211.7           |
| <i>Nitrosopumilus maritimus</i>                   | SlaA1   | A9A5U2          | -213.7           |
| <i>Nitrosopumilus maritimus</i>                   | SlaB    | A9A4Y8          | -20              |
| <i>Ca. Nitrososphaerota catalina</i>              | SlaA    | WP_086907064.1  | -206.6           |
| <i>Ca. Nitrososphaerota catalina</i>              | SlaB    | WP_225971295.1  | -19.1            |
| <i>Ca. Nitrosopumilus sediminis</i>               | SlaA    | WP_014965859.1  | -194.5           |
| <i>Ca. Nitrosopumilus sediminis</i>               | SlaA1   | WP_016940265.1  | -67.2            |
| <i>Ca. Nitrosopumilus sediminis</i>               | SlaB    | AFS83491.1      | -17.1            |
| <i>Ca. Nitrosopumilus salaria</i>                 | SlaA    | WP_048097520.1  | -184.5           |
| <i>Ca. Nitrosopumilus salaria</i>                 | SlaB    | WP_008300022.1  | -18.1            |
| <i>Nitrosopumilus adriaticus</i>                  | SlaA    | WP_048115011.1  | -197.5           |
| <i>Nitrosopumilus adriaticus</i>                  | SlaA1   | WP_048116094.1  | -70.2            |
| <i>Nitrosopumilus adriaticus</i>                  | SlaB    | WP_048115014.1  | -14.1            |
| <i>Nitrosopumilus piranensis</i>                  | SlaA    | WP_148702275.1  | -232.8           |
| <i>Nitrosopumilus piranensis</i>                  | SlaA1   | AJM93167.1      | -63.3            |
| <i>Nitrosopumilus piranensis</i>                  | SlaB    | WP_148702274.1  | -16.1            |
| <i>Ca. Nitrosopumilus koreensis</i>               | SlaA    | WP_014963920.1  | -202.8           |
| <i>Ca. Nitrosopumilus koreensis</i>               | SlaA1   | AFS80276.1      | -69.2            |
| <i>Ca. Nitrosopumilus koreensis</i>               | SlaB    | WP_014963919.1  | -16              |
| <b>Nitrososphaerota (genus Cenarchaeum)</b>       |         |                 |                  |
| <i>Cenarchaeum symbiosum A</i>                    | SlaA    | ABK76806.1      | -285.2           |
| <i>Cenarchaeum symbiosum A</i>                    | SlaA1   | ABK76804.1      | -284.3           |
| <i>Cenarchaeum symbiosum A</i>                    | SlaA2   | ABK78662.1      | -277.4           |
| <i>Cenarchaeum symbiosum A</i>                    | SlaB    | ABK78037.1      | -25.9            |
| <b>Nitrososphaerota (genus Nitrosarchaeum)</b>    |         |                 |                  |
| <i>Ca. Nitrosarchaeum limnium</i>                 | SlaA    | EGG41144.1      | -130.1           |
| <i>Ca. Nitrosarchaeum limnium</i>                 | SlaB    | WP_010193228.1  | -13.2            |
| <i>Nitrosarchaeum koreense</i>                    | SlaA    | WP_048110047.1  | -173.6           |
| <i>Nitrosarchaeum koreense</i>                    | SlaB    | WP_007551396.1  | -22.1            |
| <b>Nitrososphaerota (genus Ca. Nitrosotenuis)</b> |         |                 |                  |
| <i>Ca. Nitrosotenuis aquarius</i>                 | SlaA    | WP_100183187.1  | -144.1           |
| <i>Ca. Nitrosotenuis aquarius</i>                 | SlaB    | WP_100183188.1  | -17.1            |
| <i>Ca. Nitrosotenuis uzonensis</i>                | SlaA    | WP_048196670.1  | -138.1           |
| <i>Ca. Nitrosotenuis uzonensis</i>                | SlaB    | WP_048196668.1  | -12.1            |
| <i>Ca. Nitrosotenuis cloacae</i>                  | SlaA    | WP_048188611.1  | -163.1           |
| <i>Ca. Nitrosotenuis cloacae</i>                  | SlaB    | AJZ75755.1      | -16.2            |
| <i>Ca. Nitrosotenuis chungbukensis</i>            | SlaA    | WP_042684620.1  | -150.9           |
| <i>Ca. Nitrosotenuis chungbukensis</i>            | SlaB    | WP_042684623.1  | -11.2            |
| <b>Nitrososphaerota (genus Ca. Nitrosotalea)</b>  |         |                 |                  |



|                                                   |               |                |        |
|---------------------------------------------------|---------------|----------------|--------|
| <i>Ca. Nitrosotalea devanaterra</i>               | SlaA          | CUR50924.1     | -64.3  |
| <i>Ca. Nitrosotalea devanaterra</i>               | SlaB          | CUR51008.1     | -3.2   |
| <i>Ca. Nitrosotalea okcheonensis</i>              | SlaA          | WP_157928030.1 | -58.3  |
| <i>Ca. Nitrosotalea okcheonensis</i>              | SlaB          | WP_231911788.1 | -1.1   |
| <i>Ca. Nitrosotalea sinensis</i>                  | SlaA          | WP_101008924.1 | -63.3  |
| <i>Ca. Nitrosotalea sinensis</i>                  | SlaB          | WP_245871850.1 | -3.2   |
| <i>Ca. Nitrosotalea bavarica</i>                  | SlaA          | WP_101477936.1 | -77    |
| <i>Ca. Nitrosotalea bavarica</i>                  | SlaB          | WP_101477185.1 | -9.2   |
| <b>Nitrososphaerota (genus Nitrososphaera)</b>    |               |                |        |
| <i>Nitrososphaera viennensis</i>                  | SlaA          | A0A060HS03     | -45.8  |
| <i>Nitrososphaera viennensis</i>                  | SlaB          | WP_144239588.1 | -3.2   |
| <i>Ca. Nitrososphaera evergladensis</i>           | SlaA          | WP_148699684.1 | -39.1  |
| <i>Ca. Nitrososphaera evergladensis</i>           | SlaB          | WP_148699685.1 | -3.2   |
| <i>Ca. Nitrososphaera gargensis</i>               | SlaA          | NC_018719.1_80 | -69.7  |
| <i>Ca. Nitrososphaera gargensis</i>               | SlaB          | WP_148680754.1 | -7     |
| <b>Nitrososphaerota (genus Ca. Nitrosocaldus)</b> |               |                |        |
| <i>Ca. Nitrosocaldus cavascurensis</i>            | SlaA          | WP_148695099.1 | -56.6  |
| <i>Ca. Nitrosocaldus cavascurensis</i>            | SlaB          | WP_103287785.1 | -8.2   |
| <b>Thermoproteota (order Sulfolobales)</b>        |               |                |        |
| <i>Acidianus ambivalens</i>                       | SlaA          | B1GT61         | -25.1  |
| <i>Acidianus ambivalens</i>                       | SlaB          | B1GT62         | -25.4  |
| <i>Sulfolobus solfataricus</i>                    | SlaA          | F0NHT7         | -3.4   |
| <i>Sulfolobus solfataricus</i>                    | SlaB          | Q980C6         | -1.1   |
| <i>Sulfolobus acidocaldarius</i>                  | SlaA          | Q4J6E5         | -11.5  |
| <i>Sulfolobus acidocaldarius</i>                  | SlaB          | AHC52676.1     | 3.8    |
| <i>Metallosphaera sedula</i>                      | SlaA          | A4YHQ8         | -16.5  |
| <i>Metallosphaera sedula</i>                      | SlaB          | A4YHQ9         | -3.2   |
| <b>Thermoproteota (order Desulfurococcales)</b>   |               |                |        |
| <i>Hyperthermus butylicus</i>                     | SlaA          | WP_011822157.1 | -95.8  |
| <i>Hyperthermus butylicus</i>                     | SlaB          | ABM80840.1     | -23.3  |
| <i>Ignisphaera aggregans</i>                      | SlaA          | ADM26894.1     | -40.5  |
| <i>Ignisphaera aggregans</i>                      | SlaB          | ADM26895.1     | -1.7   |
| <i>Staphylothermus marinus</i>                    | Tetrabrachion | Q54436         | -66.6  |
| <i>Aeropyrum pernix</i>                           | SlaA          | Q9YEG7         | -180.2 |
| <b>Euryarchaeota (order Haloferacales)</b>        |               |                |        |
| <i>Haloferax volcanii</i>                         | Csg           | P25062         | -138   |
| <i>Haloferax mediterranei</i>                     | Csg           | I3R2Z6         | -149.2 |
| <b>Euryarchaeota (order Methanomicrobiales)</b>   |               |                |        |
| <i>Methanospirillum hungatei</i>                  | Csg           | WP_011449226.1 | -34.5  |
| <b>Euryarchaeota (order Methanobacteriales)</b>   |               |                |        |
| <i>Methanothermobacter ferredoxianus</i>          | Csg           | P27373         | -1.2   |

**Supplementary Table 2 | Ammonium binding residues predicted by MD.** Listed are residues with average occupancy >50% as computed by PyLipID over three 0.1 M NH<sub>4</sub><sup>+</sup> NmSLP hexamer simulations.

| #  | Residue | Avg Occ | std dev | #  | Residue | Avg Occ | std dev |
|----|---------|---------|---------|----|---------|---------|---------|
| 1  | ASP71   | 50.55   | 10.33   | 32 | ASP918  | 75.53   | 3.91    |
| 2  | ASP73   | 81.03   | 14.89   | 33 | GLU923  | 80.67   | 6.20    |
| 3  | GLU74   | 90.33   | 15.01   | 34 | GLU1002 | 95.25   | 2.50    |
| 4  | GLU143  | 55.97   | 23.37   | 35 | GLU1082 | 71.14   | 17.70   |
| 5  | GLU196  | 75.17   | 8.16    | 36 | ASP1088 | 80.25   | 19.95   |
| 6  | ASP257  | 69.81   | 3.01    | 37 | GLU1150 | 89.75   | 3.77    |
| 7  | ASP260  | 76.83   | 8.44    | 38 | ASP1152 | 81.59   | 3.64    |
| 8  | ASP293  | 85.19   | 9.06    | 39 | ASP1248 | 51.44   | 18.72   |
| 9  | GLU294  | 61.70   | 7.26    | 40 | ASP1263 | 93.56   | 0.88    |
| 10 | GLU321  | 87.30   | 8.96    | 41 | ASP1278 | 53.89   | 1.77    |
| 11 | ASP343  | 83.19   | 8.55    | 42 | ASP1297 | 94.64   | 3.43    |
| 12 | ASN444  | 52.16   | 6.03    | 43 | PRO1298 | 63.41   | 9.83    |
| 13 | GLU445  | 58.80   | 4.19    | 44 | GLU1299 | 96.55   | 2.14    |
| 14 | GLU473  | 71.03   | 5.53    | 45 | ASP1308 | 55.72   | 1.09    |
| 15 | ASP490  | 79.58   | 5.88    | 46 | GLU1318 | 73.42   | 4.43    |
| 16 | ASP492  | 61.67   | 2.19    | 47 | GLU1329 | 73.72   | 12.50   |
| 17 | ASP494  | 84.39   | 4.57    | 48 | GLU1352 | 53.44   | 21.28   |
| 18 | ASP510  | 69.78   | 11.86   | 49 | ASP1353 | 51.31   | 1.00    |
| 19 | GLU516  | 67.83   | 11.66   | 50 | ASP1355 | 74.81   | 7.91    |
| 20 | GLU610  | 86.19   | 5.34    | 51 | ASP1394 | 57.61   | 19.28   |
| 21 | GLU746  | 69.72   | 6.08    | 52 | GLU1486 | 66.89   | 6.87    |
| 22 | GLU748  | 66.78   | 3.99    | 53 | ASP1487 | 71.53   | 6.62    |
| 23 | GLU762  | 87.22   | 3.26    | 54 | ASP1538 | 52.47   | 0.55    |
| 24 | ASP785  | 71.53   | 1.57    | 55 | ASP1549 | 56.58   | 6.51    |
| 25 | ASP786  | 78.22   | 1.19    | 56 | ASP1572 | 51.19   | 18.72   |
| 26 | GLU798  | 95.66   | 2.47    | 57 | GLU1590 | 75.47   | 1.75    |
| 27 | ASP799  | 83.31   | 0.17    | 58 | GLU1592 | 76.53   | 5.21    |
| 28 | ASP855  | 86.61   | 1.13    | 59 | ASP1598 | 66.31   | 6.33    |
| 29 | ASP857  | 68.42   | 2.07    | 60 | ASP1604 | 57.92   | 22.45   |
| 30 | ASP899  | 92.89   | 1.93    | 61 | ASP1607 | 76.86   | 2.95    |
| 31 | ASP916  | 75.86   | 3.85    |    |         |         |         |

## Supplementary Table 3 | Reliability and reproducibility checklist for molecular dynamics simulations.

---

### 1. Convergence of simulations and analysis

---

1a. Is an evaluation presented in the text to show that the property being measured has equilibrated in the simulations (e.g., time-course analysis)? **YES**

1b. Then, is it described in the text how simulations are split into equilibration and production runs and how much data were analyzed from production runs? **YES**

1c. Are there at least 3 simulations per simulation condition with statistical analysis? **YES**

1d. Is evidence provided in the text that the simulation results presented are independent of initial configuration? **YES**

---

### 2. Connection to experiments

---

2a. Are calculations provided that can connect to experiments (e.g., loss or gain in function from mutagenesis, binding assays, NMR chemical shifts, J-couplings, SAXS curves, interaction distances or FRET distances, structure factors, diffusion coefficients, bulk modulus and other mechanical properties, etc.)? **YES, simulations use structures derived from cryoEM experiments and simulation results are compared directly to cryoEM data.**

---

### 3. Method choice

---

3a. Do simulations contain membranes, membrane proteins, intrinsically disordered proteins, glycans, nucleic acids, polymers, or cryptic ligand binding? **NO**

3b. Is it described in the text whether the accuracy of the chosen model(s) is sufficient to address the question(s) under investigation (e.g., all-atom vs. coarse-grained models, fixed charge vs. polarizable force fields, implicit vs. explicit solvent or membrane, specific force field and water model, etc.)? **Our chosen protocol (all-atom, explicit solvent, CHARMM36 force field) is more than adequate to characterize the interactions of interest in this study. An explicit discussion of this in the text is not required.**

3c. Is the timescale of the event(s) under investigation beyond the brute-force MD simulation timescale in this study that enhanced sampling methods are needed? **NO**

If YES, are the parameters and convergence criteria for the enhanced sampling method clearly stated? If NO, is the evidence provided in the text? **N/A**

---

### 4. Code and reproducibility

---

4a. Is a table provided describing the system setup that includes simulation box dimensions, total number of atoms, number of water molecules, salt concentration, lipid composition (number of molecules and type)? **All this information is provided in the Methods.**

4b. Are other parameters for the system setup described in the text, such as protonation state, type of structural restraints if applied, nonbonded cutoff, thermostat and barostat, etc.? **All this information is provided in the Methods.**

4c. Is it described in the text what simulation and analysis software and which versions are used? **All this information is provided in the Methods.**

4d. Are initial coordinate and simulation input files and a coordinate file of the final output provided as supplementary files or in a public repository? **Initial coordinates have been deposited in the Protein Data Bank. All simulation input settings have been described in the Methods.**

4e. Is there custom code or custom force field parameters? **Ammonium parameters were obtained by trivial analogy with existing parameters for methylammonium.**

If YES, are they provided as supplementary files or in a public repository? **The file is appended below as .txt**

---

---

\* Topology File.

\*

99 1  
MASS -1 NG3P3 14.00700 ! primary NH3+, phosphatidylethanolamine  
MASS -1 HGP2 1.00800 ! polar H, +ve charge

RESI AMMO 1.000

GROUP

ATOM NZ NG3P3 -0.32 ! HZ1  
ATOM HZ1 HGP2 0.33 ! (+) |  
ATOM HZ2 HGP2 0.33 ! HZ4---NZ--HZ2  
ATOM HZ3 HGP2 0.33 ! |  
ATOM HZ4 HGP2 0.33 ! HZ3

BOND NZ HZ1 ! dist 1.0400  
BOND NZ HZ2 ! dist 1.0400  
BOND NZ HZ3 ! dist 1.0400  
BOND NZ HZ4 ! dist 1.0400

#####

\* Force Field Parameter File.

\*

ATOMS

MASS -1 NG3P3 14.00700 ! primary NH3+, phosphatidylethanolamine  
MASS -1 HGP2 1.00800 ! polar H, +ve charge

BONDS

NG3P3 HGP2 403.00 1.0400 ! PROT new stretch and bend; methylammonium (KK 03/10/92)

ANGLES

HGP2 NG3P3 HGP2 44.00 109.50 ! PROT new stretch and bend; methylammonium (KK 03/10/92)

DIHEDRALS

IMPROPER

NONBONDED nbxmod 5 atom cdie1 shift vatom vdistance vswitch -

cutnb 14.0 ctofnb 12.0 ctonnb 10.0 eps 1.0 e14fac 1.0 wmin 1.5

! Emin Rmin/2 Emin/2 Rmin (for 1-4's)

! (kcal/mol) (A)

---

## **Supplementary Video Legends**

### **Supplementary Video 1| Cryo-electron tomography of *N. maritimus* and NmSLP S-layer structure.**

The cryo-ET STA map and structure of the *N. maritimus* S-layer show how NmSLP monomers form the lattice. Different views of the S-layer are shown with text annotations.

### **Supplementary Video 2| Cryo-electron tomography of *N. maritimus*.**

Slices through tomogram of the same *N. maritimus* cell shown in Supplementary Video 1 without segmentation to enable direct assessment of the cryoET density.

### **Supplementary Video 3| Cryo-EM structure of isolated NmSLP and structural comparison to cryo-ET structure.**

The cryo-EM map and structure of the *N. maritimus* S-layer compared with the *in situ* STA structure.

### **Supplementary Video 4| Ammonium binding in MD simulations.**

Residues identified by PyLipID with average ammonium occupancy >50% for three 0.1 M  $\text{NH}_4^+$  NmSLP hexamer simulations. Each residue is coloured by its occupancy value, which was averaged over the six NmSLP monomers, and mapped on to the hexamer structure. Residue numbers and occupancies with standard deviations are given in Supplementary Table 2. This video was produced using the VDM software.
